# Supplementary material for: The architecture of neutrophil extracellular traps investigated by atomic force microscopy
Source: Royal Society of Chemistry journal article supplement (doi:10.1039/c6nr03416k), 2016-01-01
Supplement: c6nr03416k1.pdf [file c6nr03416k1.pdf]

## Electronic Supplementary Information

### **The Architecture of Neutrophil Extracellular Traps**

#### **Investigated by Atomic Force Microscopy**

Ricardo H. Pires,<sup>\*abd</sup> Stephan B. Felix,<sup>bd</sup> and Mihaela Delcea<sup>\*acd</sup>

<sup>a</sup> ZIK HIKE – Center for Innovation Competence, Humoral Immune Reactions in Cardiovascular Diseases, University of Greifswald, Germany.

<sup>b</sup> Department of Internal Medicine B, Cardiology, University Medicine Greifswald, Germany.

<sup>c</sup> Institute for Immunology and Transfusion Medicine, University Medicine Greifswald, Germany.

<sup>d</sup> DZHK (German Centre for Cardiovascular Research), partner site Greifswald, Germany

\*E-mail: [piresr@uni-greifswald.de](mailto:piresr@uni-greifswald.de); [delceam@uni-greifswald.de](mailto:delceam@uni-greifswald.de)

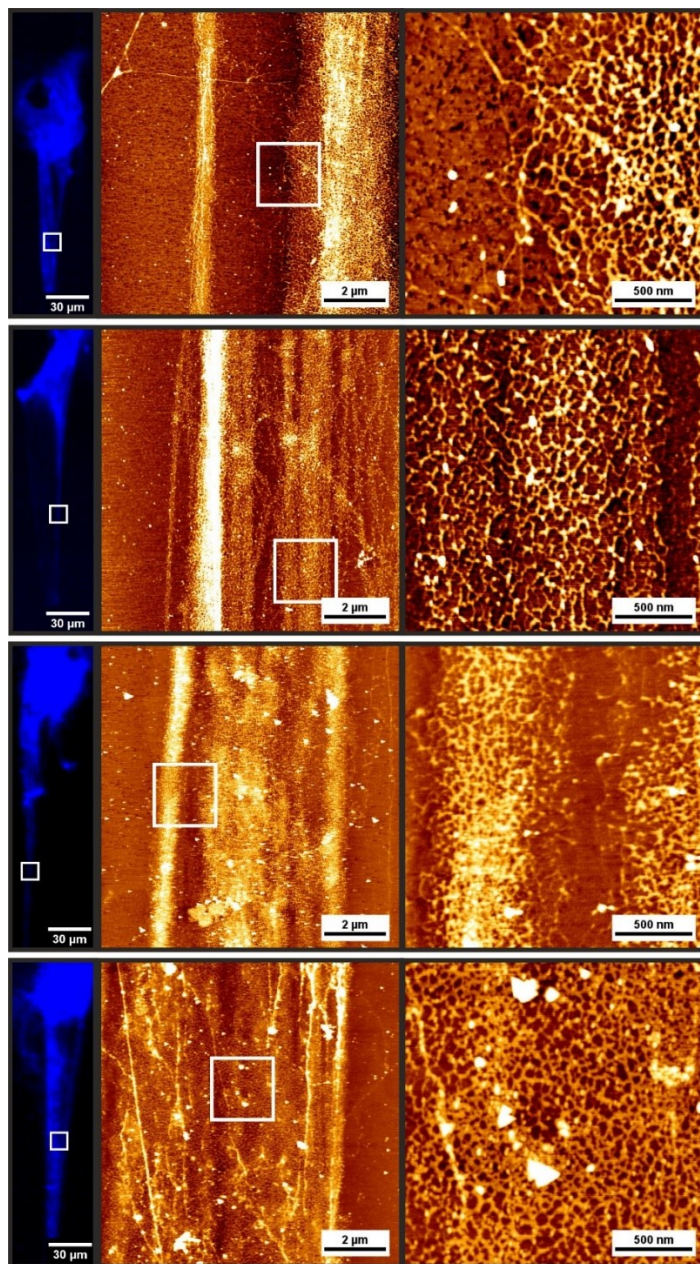

**Figure S1:** Four different representative images of NETs imaged by fluorescence microscopy (left panels) and AFM (central and right panels). AFM images correspond to the height channel. White squares indicate areas imaged in greater detail.

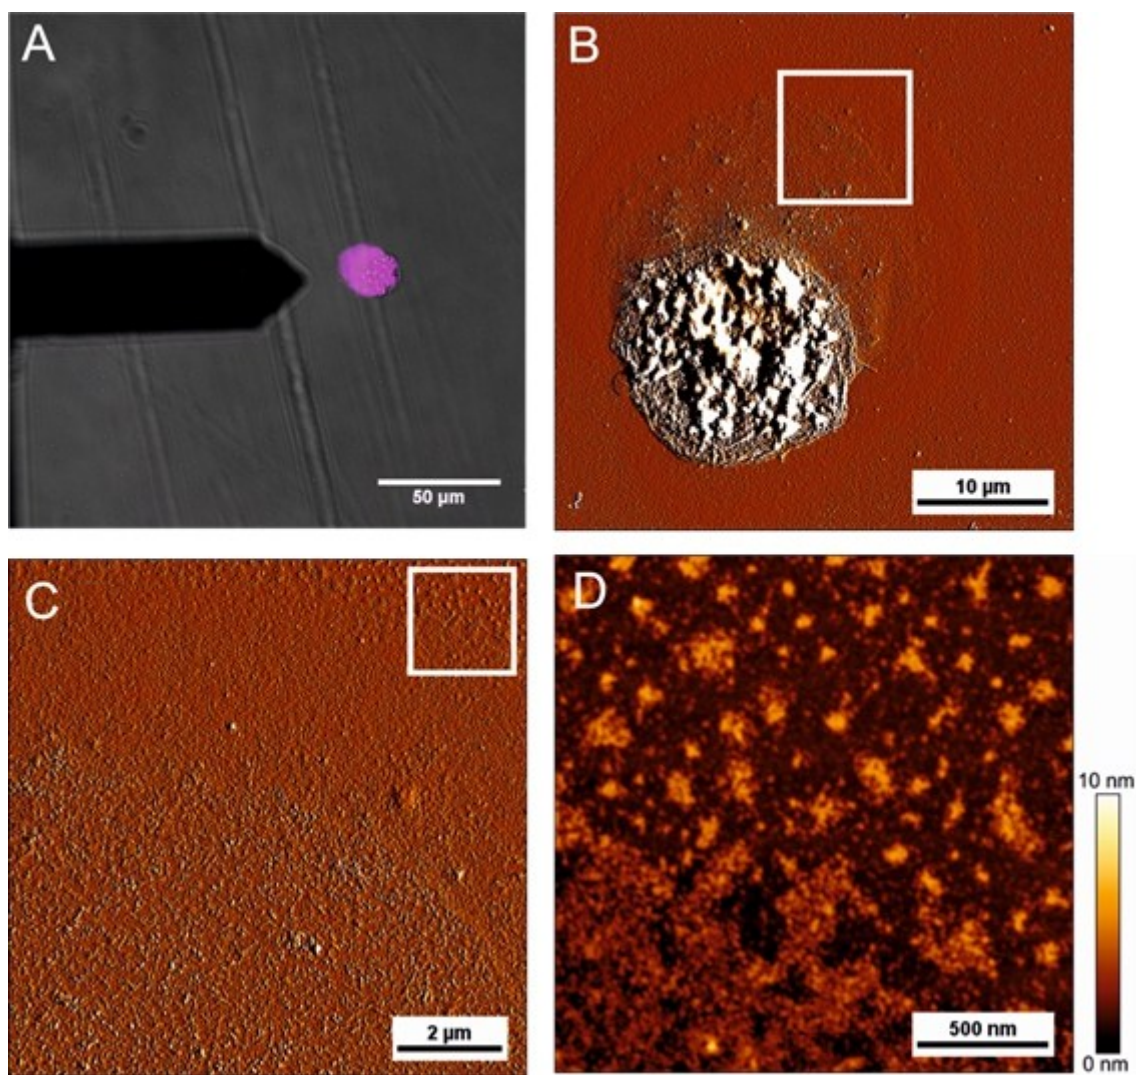

**Figure S2:** Fluorescence (A) and AFM (B-C) visualization of chromatin of a neutrophil adhered on mica, followed by drying shows that chromatin remains circumscribed to cellular body.

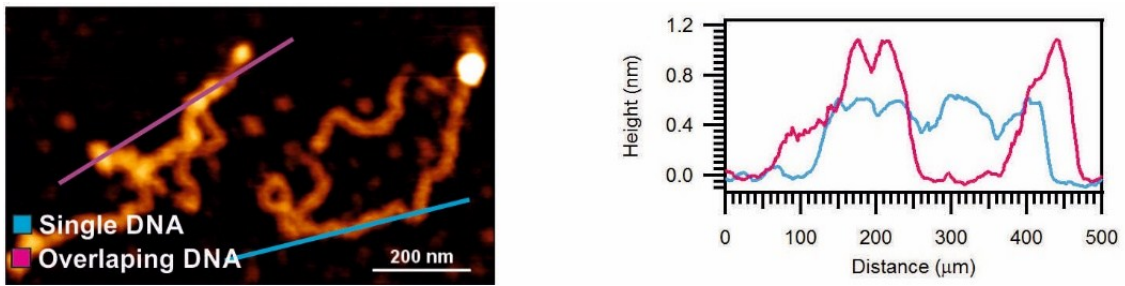

**Figure S3:** (Left) Height contrast AFM image of two plasmids, showing overlapping and non-overlapping sections (Right) height profiles taken along the two lines drawn across the preceding panel.
